# Supplementary material for: Soluble poly(4-fluorostyrene): a high-performance dielectric electret for organic transistors and memories
Source: Royal Society of Chemistry journal article supplement (doi:10.1039/d0mh00203h), 2020-01-01
Supplement: d0mh00203h1.pdf [file d0mh00203h1.pdf]

**Soluble Poly(4-fluorostyrene): a High-performance Dielectric Electret  
for Organic Transistors and Memories**

Supporting Information

**Table S1.** Dielectric polymers and their related OFET performances

| Ref  | Dielectric/Semiconductor                                | Mobility<br>( $\text{cm}^2 \cdot \text{s}^{-1} \cdot \text{V}^{-1}$ ) | $I_{\text{on}}/I_{\text{off}}$ | Mem. W.<br>(V) |
|------|---------------------------------------------------------|-----------------------------------------------------------------------|--------------------------------|----------------|
| [29] | SiO <sub>2</sub> /pentacene                             | 0.23                                                                  | 10 <sup>6</sup>                | N/A            |
| [29] | PVA/pentacene                                           | 0.07                                                                  | 10 <sup>5</sup>                | N/A            |
| [17] | PS/pentacene                                            | 0.71                                                                  | 5×10 <sup>4</sup>              | 4.3            |
| [24] | a-PMMA/pentacene                                        | 0.38                                                                  | ~10 <sup>7</sup>               | 8              |
| [S1] | Triple-layer PVP/pentacene                              | 0.24                                                                  | 10 <sup>3</sup>                | 11             |
| [29] | PVP/pentacene                                           | 0.21                                                                  | 10 <sup>5</sup>                | 17             |
| [40] | PS/pentacene                                            | 0.02                                                                  | N/A                            | 19.4           |
| [32] | PFPS-b-40/pentacene                                     | 0.28                                                                  | 10 <sup>6</sup>                | 20.9           |
| [29] | PVPyr/pentacene                                         | 0.12                                                                  | 10 <sup>5</sup>                | 21             |
| [29] | PS/pentacene                                            | 0.26                                                                  | 10 <sup>5</sup>                | 22.1           |
| [29] | P4MS/pentacene                                          | 0.25                                                                  | 10 <sup>5</sup>                | 24.1           |
| [29] | PaMS/pentacene                                          | 0.35                                                                  | 10 <sup>5</sup>                | 26             |
| [29] | PVN/pentacene                                           | 0.61                                                                  | 10 <sup>6</sup>                | 27.8           |
| [25] | PI(6FOH-ODPA)/1-aminopyrene/pentacene                   | 0.09                                                                  | 10 <sup>5</sup>                | 29.9           |
| [44] | PS-DPP-n-I/pentacene                                    | 0.22                                                                  | 3.2×10 <sup>5</sup>            | 32.7           |
| [40] | P3TFMS/pentacene                                        | 0.03                                                                  | N/A                            | 33.1           |
| [32] | PFBT-10/pentacene                                       | 0.35                                                                  | 10 <sup>6</sup>                | 34.8           |
| [S2] | IPPA-CL/TIPS-pentacene                                  | 0.09                                                                  | 10 <sup>6</sup>                | 40.8           |
| [22] | poly(4-vinylpyridine)-Phenol/pentacene                  | 0.16                                                                  | 2.9×10 <sup>7</sup>            | 43             |
| [41] | WG3/pentacene                                           | 0.33                                                                  | 10 <sup>6</sup>                | 45             |
| [22] | poly(4-vinylpyridine)-2-Naphthol/pentacene              | 0.23                                                                  | 6.2×10 <sup>7</sup>            | 61             |
| [S3] | PS/pentacene                                            | 0.6                                                                   | 10 <sup>5</sup>                | 70             |
| [46] | P(St-F1)3/pentacene                                     | 0.47                                                                  | 3×10 <sup>7</sup>              | 76             |
| [22] | poly(4-vinylpyridine)-2-hydroxyanthracene/<br>pentacene | 0.12                                                                  | 10 <sup>7</sup>                | 76             |
| [39] | PI(BAPF-6FDA)/pentacene                                 | 0.73                                                                  | 10 <sup>6</sup>                | 77             |
| [S4] | PI(6FDA-TPA-CN)/pentacene                               | 5.0×10 <sup>-4</sup>                                                  | 3×10 <sup>6</sup>              | 84             |
| [3]  | PaMS/pentacene                                          | 0.51                                                                  | 10 <sup>5</sup>                | 90             |
| [26] | 8-3-NTCDI/SiO <sub>2</sub>                              | 0.12                                                                  | 10 <sup>6</sup>                | 4.4            |
| [73] | CYTOP/C <sub>60</sub>                                   | 0.40                                                                  | 10 <sup>5</sup>                | 10             |
| [S5] | PTCDI/PI-B                                              | 0.31                                                                  | 10 <sup>5</sup>                | 15.5           |
| [25] | N(PTPMA)3/BPE-PTCDI                                     | 0.03                                                                  | 3.1×10 <sup>5</sup>            | 33.5           |
| [23] | PI(APSP-6FDA)/BPE-PTCDI                                 | 3.6×10 <sup>-3</sup>                                                  | 8.7×10 <sup>3</sup>            | 63             |
| [42] | PVTT/BPE-PTCDI                                          | 7.1×10 <sup>-5</sup>                                                  | 3.6×10 <sup>3</sup>            | 81             |

**Table S2.** Memory window, retention time, and charge density of electret in OFETs with various gate dielectric materials. No. of Ref. refers to Fig. 4e.

| No. | Ref. | Dielectric/Semiconductor                  | Mem.W.<br>(V) | Retention<br>(s) | Charge density<br>of electret<br>( $10^{12} \text{ cm}^{-2}$ ) |
|-----|------|-------------------------------------------|---------------|------------------|----------------------------------------------------------------|
| 1   | [25] | TIPS-pen:N(PTPMA) <sub>3</sub> /BPE-PTCDI | 30            | 5.0E3            | 2.05                                                           |
| 2   | [S2] | PPA/TIPS-pentacene                        | 15            | 4.5E3            | 0.92                                                           |
| 3   | [S2] | PPA-Cl/TIPS-pentacene                     | 11.1          | 6.2E3            | 0.62                                                           |
| 4   | [S2] | PPA-NO <sub>2</sub> /TIPS-pentacene       | 14.6          | 5.2E3            | 0.88                                                           |
| 5   | [S2] | IPPA/TIPS-pentacene                       | 33.4          | 1.2E4            | 1.12                                                           |
| 6   | [S2] | IPPA-Cl/TIPS-pentacene                    | 40.8          | 4.0E3            | 2.66                                                           |
| 7   | [S2] | IPPA-NO <sub>2</sub> /TIPS-pentacene      | 25.5          | 2.0E4            | 1.09                                                           |
| 8   | [29] | PS/pentacene                              | 4.3           | 5.2E4            | 0.88                                                           |
| 9   | [29] | PaMS/pentacene                            | 26            | 2.2E4            | 5.35                                                           |
| 10  | [29] | PVN/pentacene                             | 27.8          | 3.4E4            | 5.73                                                           |
| 11  | [29] | PVPyr/pentacene                           | 21            | 4.2E3            | 4.33                                                           |
| 12  | [29] | P4MS/pentacene                            | 24.1          | 2.1E4            | 3.82                                                           |
| 13  | [29] | PVP/pentacene                             | 17            | 2.4E3            | 2.69                                                           |
| 14  | [32] | PFBT-10/pentacene                         | 34.9          | 1.0E4            | 4.81                                                           |
| 15  | [73] | PaMS/pentacene                            | 90            | 3.6E5            | 2.81                                                           |
| 16  | [S4] | Phenol/pentacene                          | 43            | 1.2E4            | 2.44                                                           |
| 17  | [28] | PMAA-GO1.5/TIPS-pentacene                 | 5.9           | 2.0E4            | 1.36                                                           |
| 18  | [28] | PMAA-GO6/TIPS-pentacene                   | 9.4           | 2.0E3            | 2.07                                                           |
| 19  | [S6] | PI(6FOH-ODPA)/pentacene                   | 29.9          | 1.0E4            | 4.61                                                           |
| 20  | [46] | P(St-FI)/pentacene                        | 99            | 1.0E4            | 2.95                                                           |
| 21  | [45] | PPF/pentacene                             | 70            | 8.0E2            | 4.81                                                           |
| 22  | [45] | PPF8/pentacene                            | 55            | 1.2E3            | 3.77                                                           |
| 23  | [22] | PI(6FDA-TPA-CN)/pentacene                 | 84            | 1.0E4            | 5.70                                                           |
| 24  | [39] | PI(BAPF-6FDA)/pentacene                   | 77            | 1.0E4            | 5.30                                                           |
| 25  | [S7] | PVK/pentacene                             | 40            | 1.0E3            | 2.74                                                           |
| 26  | [23] | PI(APSP-6FDA)/pentacene                   | 63            | 3.0E3            | 4.33                                                           |
| 27  | [S8] | star-PTPMA/BPE-PTCDI                      | 36.5          | 1.5E5            | 2.18                                                           |
| 28  | [S3] | PS with Au nanoparticles /pentacene       | 70            | 5.0E5            | 2.00                                                           |
| 29  | [44] | PS-DPP-n-I/pentacene                      | 32.7          | 2.0E5            | 2.24                                                           |
| 30  | [42] | PVTT/BPE-PTCDI                            | 81            | 1.0E5            | 4.21                                                           |
| 31  | [41] | WG3/pentacene                             | 45            | 2.0E3            | 2.97                                                           |

**Table S3.** Performance of C12-BTBT/FPS and C12-BTBT/PS OFET devices

|                                          | C12-BTBT/FPS         | C12-BTBT/PS          |
|------------------------------------------|----------------------|----------------------|
| $\mu_{\max}$                             | 11.2                 | 13.8                 |
| $\mu_{\text{average}}$                   | 10.3                 | 11.9                 |
| $I_{\text{on}}/I_{\text{off}}$ (average) | $\sim 1 \times 10^7$ | $\sim 3 \times 10^6$ |
| $V_{\text{th-average}}$                  | -13                  | -24                  |

**Table S4.** Performance of PCDTPT/FPS and PCDTPT/PS OFET devices

| Device structure                         | PCDTPT/FPS           | PCDTPT/PS            |
|------------------------------------------|----------------------|----------------------|
| $\mu_{\max}$                             | 0.36                 | 0.39                 |
| $\mu_{\text{average}}$                   | 0.33                 | 0.31                 |
| $I_{\text{on}}/I_{\text{off}}$ (average) | $\sim 5 \times 10^5$ | $\sim 8 \times 10^5$ |
| $V_{\text{th-average}}$                  | -12                  | -8                   |

**Table S5.** Relaxation processes with activation energies of FPS and PS, according to Fig. 3a-3f

| Relaxation             | Mechanism             | FPS     | PS      |
|------------------------|-----------------------|---------|---------|
| $\alpha$ (high temp.)  | Backbone relaxation   | 1.40 eV | 1.79 eV |
| $\beta$ (middle temp.) | Side chain relaxation | 0.75 eV | 0.39 eV |
| $\gamma$ (low temp.)   | Dipolar polarization  | 0.41 eV | N/A     |

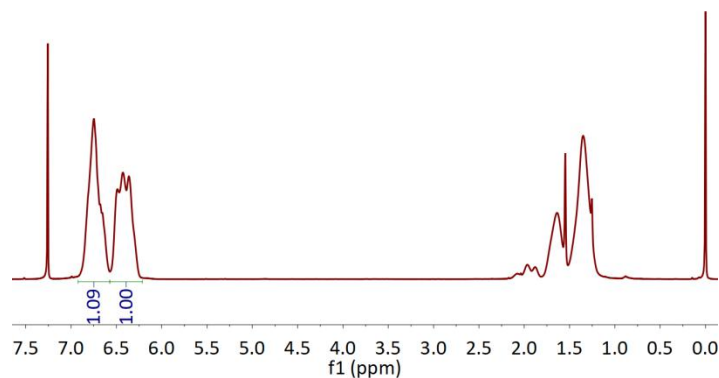

**Fig. S1.** The  $^1\text{H}$  NMR spectrum of poly(4-fluorostyrene). The multi peaks at  $\delta$  6.93 – 6.58 (a) and  $\delta$  6.40 – 6.57 (b) assigned to hydrogens (2H) at the benzene near and away from the fluorine respectively.

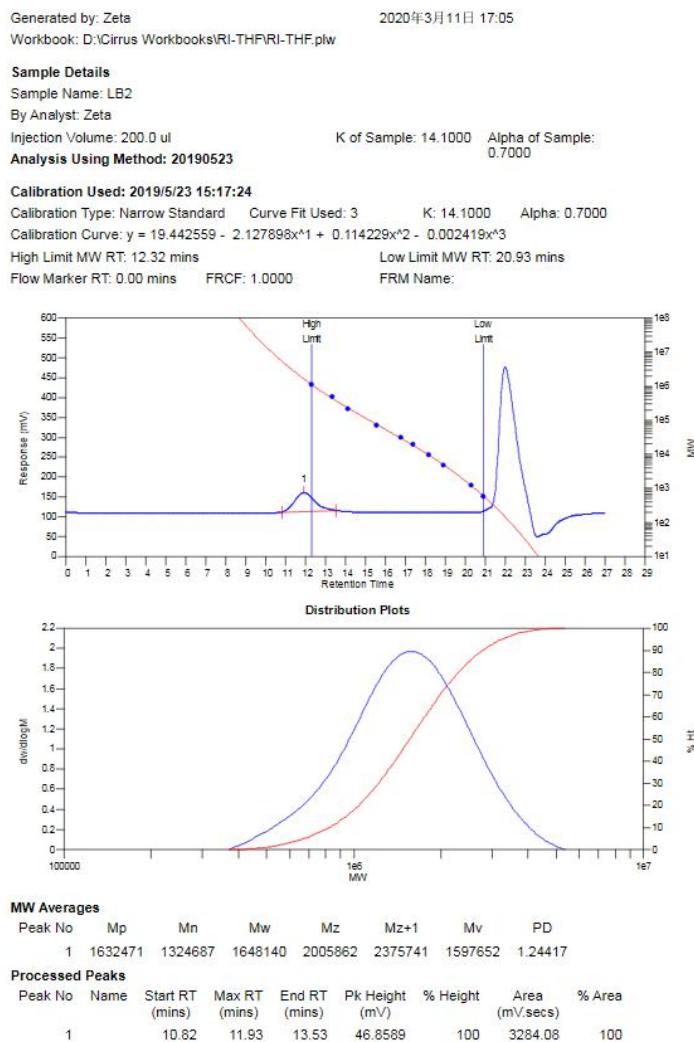

**Fig. S2.** GPC result of FPS, indicating  $M_w = 1600$  kDa with PDI = 1.25

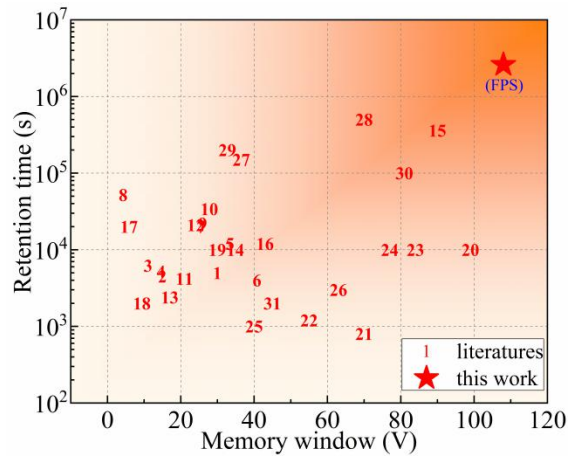

**Fig. S3.** Memory window and retention time of OFET performances for different polymeric gate dielectric materials. The reference numbers are provided in Table S2.

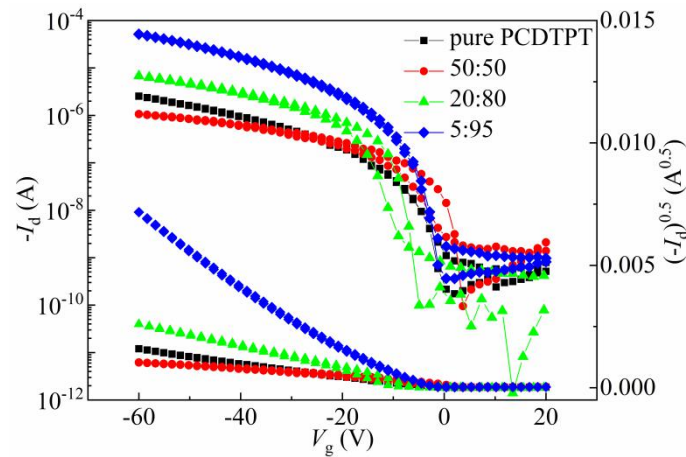

**Fig. S4.** The transfer characteristics of PCDTPT/PS OFETs with the content ratios (PCDTPT:PS wt%) of a) pure PCDTPT b) 50:50 c) 20:80 and d) 5:95.

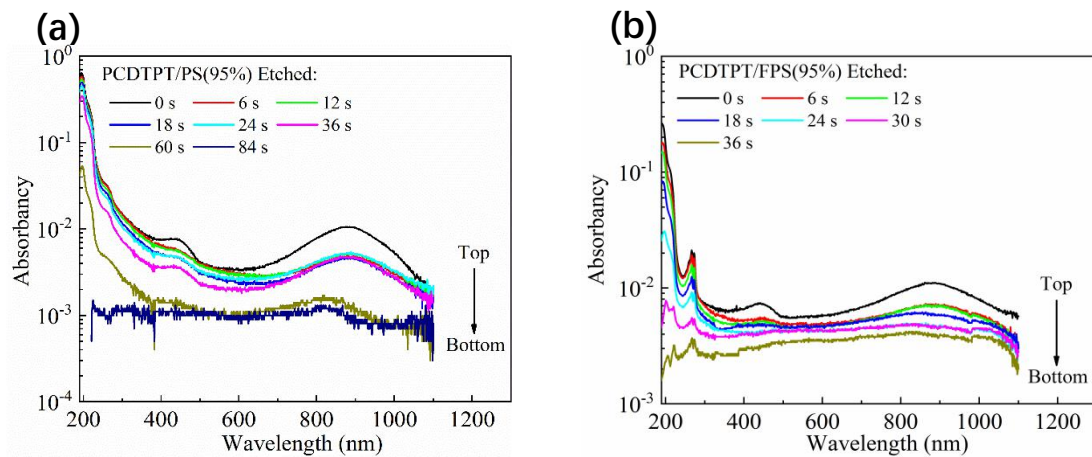

**Fig. S5.** Light absorbance of (a) PCDTPT/PS (95%) (b) PCDTPT/FPS (95%) blend films during oxygen plasma etching ( $\sim 30$  Pa). After oxygen plasma treatment ( $\geq 6$  s), the evolution of the absorption peaks of PCDTPT (450 nm and 900 nm) decrease with substantially unchanged absorption peaks of PS and FPS ( $\sim 190$  nm), which implies that PCDTPT is partly enriched at the top sublayers of the blend film. However, there are still some minor PCDTPT molecules in the PS matrix.

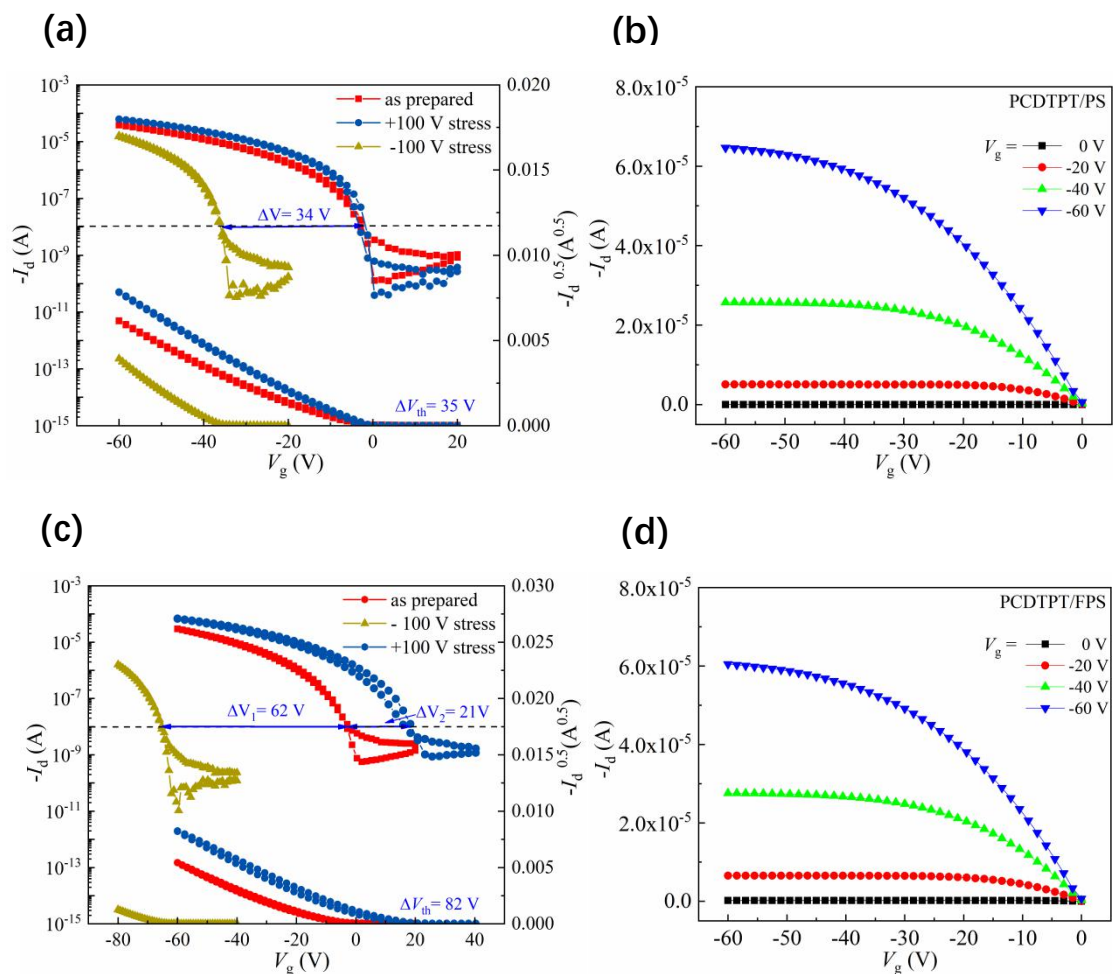

**Fig. S6.** OFET performances of PCDTPT/PS and PCDTPT/FPS (a) Transfer characteristics of PCDTPT/PS OFET with  $\pm 100$  V and without gate stresses, (b) Output characteristics of an as-prepared PCDTPT/PS OFET. (c) Transfer characteristics of PCDTPT/FPS OFET with  $\pm 100$  V and without gate stresses. (d) Output characteristics of an as-prepared PCDTPT/FPS OFET.

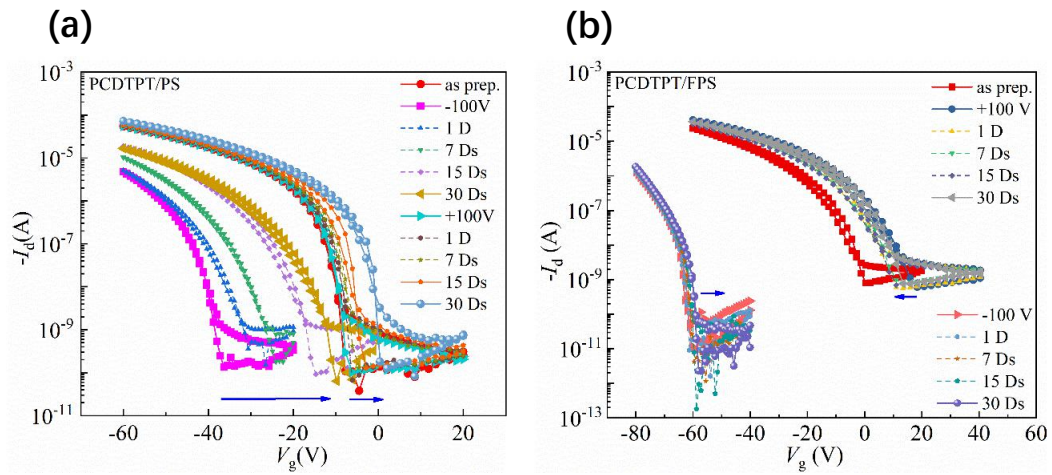

**Fig. S7.** Ambient memory stabilities of (a) PCDTPT/PS and (b) PCDTPT/FPS OFET devices with positive and negative electrets in one month.

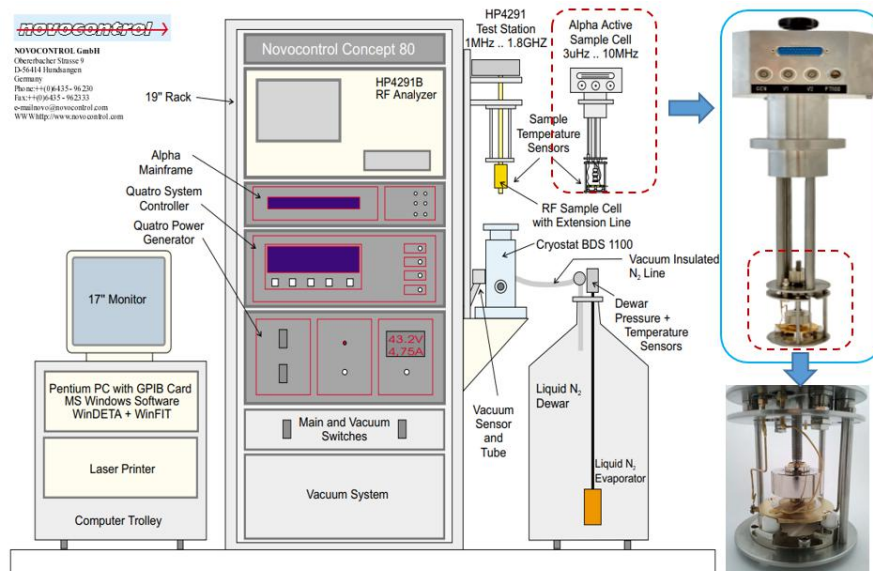

**Fig. S8.** Schematic of Novo control Concept 80 testing system and Alpha-A sample cell for dielectric characterization



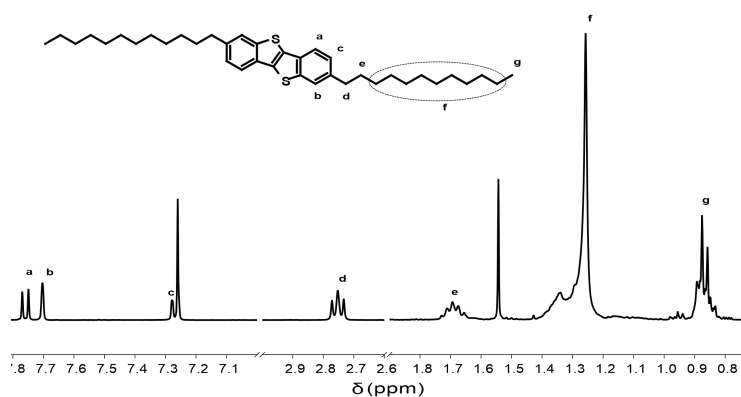

**Fig. S9.**  $^1\text{H}$  NMR spectrum of C12-BTBT

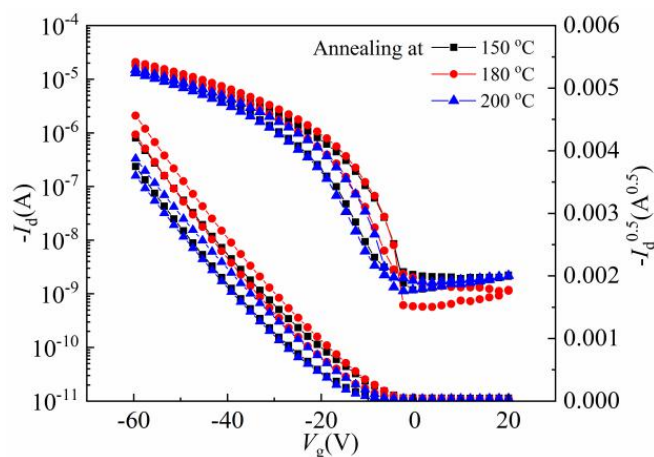

**Fig. S10.** Transfer characteristics of PCDTPT/PS (95%) OFETs with annealing temperatures of 150 °C, 180 °C, and 200 °C respectively, showing 180 °C is the best selected annealing temperature with improved device performance.

- S1. C. C. Chang, Z. Pei and Y. J. Chan, *Appl. Phys. Lett.* 2008, **93**, 368.
- S2. Z. Wu, W. Sun, H. Tian, Z. Yu, R. Guo, X. Shao and H. Zhang, *Adv. Electron. Mater.* 2018, **5**, 1800598.
- S3. X. J. She, C. H. Liu, Q. J. Sun, X. Gao and S. D. Wang, *Org. Electron.* 2012, **13**, 1908.
- S4. Y. H. Chou, H. J. Yen, C. L. Tsai, W. Y. Lee, G. S. Liou and W. C. Chen, *J. Mater. Chem. C* 2013, **1**, 3235.
- S5. Y. F. Wang, M. R. Tsai, Y. S. Lin, F. C. Wu, C. Y. Lin, H. L. Cheng, S. J. Liu, F. C. Tang and W. Y. Chou, *Org. Electron.* 2015, **26**, 359.

- S6. W. C. Chen, W. Y. Tung, M. H. Li, H. C. Wu, H. Y. Liu and Y. T. Hsieh, *Chem-Asian J.* 2016, **11**, 1631.
- S7. Y. Li, Q. Feng, H. Ling, Y. Chang and H. Wei, *J. Polym. Sci. Pol. Chem.* 2017, **55**, 3554.
- S8. Y. C. Chiu, C. L. Liu, W. Y. Lee, Y. Chen, T. Kakuchi and W. C. Chen, *NPG Asia Mater.* 2013, **5**, e35.
